# Supplementary material for: Tau filaments from multiple cases of sporadic and inherited Alzheimer’s disease adopt a common fold
Source: PubMed Central journal article supplement (PMC6208733; doi:10.1007/s00401-018-1914-z), 2018-10-01
Supplement: 401_2018_1914_MOESM2_ESM.pdf [file 401_2018_1914_MOESM2_ESM.pdf]

## Online Resource 2: Electron cryo-microscopy structure determination

|                                               | Case 2       |              | Case 3       |              | Case 16      |              |
|-----------------------------------------------|--------------|--------------|--------------|--------------|--------------|--------------|
| <b>Data Collection</b>                        | <b>PHFs</b>  | <b>SFs</b>   | <b>PHFs</b>  | <b>SFs</b>   | <b>PHFs</b>  | <b>SFs</b>   |
| Magnification                                 | ×105,000     | ×105,000     | ×105,000     | ×105,000     | ×165,000     | ×165,000     |
| Defocus range (μm)                            | -1.7 to -2.8 | -1.7 to -2.8 | -1.7 to -2.8 | -1.7 to -2.8 | -1.7 to -2.8 | -1.7 to -2.8 |
| Voltage (kV)                                  | 300          | 300          | 300          | 300          | 300          | 300          |
| Microscope                                    | Titan Krios  | Titan Krios  | Titan Krios  | Titan Krios  | Titan Krios  | Titan Krios  |
| Detector                                      | K2 Summit    | K2 Summit    | K2 Summit    | K2 Summit    | K2 Summit    | K2 Summit    |
| Frame exposure time (ms)                      | 200          | 200          | 200          | 200          | 250          | 250          |
| Number of frames                              | 50           | 50           | 50           | 50           | 44           | 44           |
| Total dose (e <sup>-</sup> /Å <sup>-2</sup> ) | 60           | 60           | 60           | 60           | 57.5         | 57.5         |
| Pixel size (Å)                                | 1.15         | 1.15         | 1.15         | 1.15         | 0.85*        | 0.85*        |
| <b>Reconstruction</b>                         |              |              |              |              |              |              |
| Box size (pixel)                              | 270          | 270          | 270          | 270          | 200          | 200          |
| Inter-box distance (Å)                        | 28           | 28           | 28           | 28           | 20           | 20           |
| Segments extracted                            | 197,500      | 62,782       | 35,400       | 35,400       | 190,409      | 190,409      |
| Segments after Class2D                        | 95,917       | 29,536       | 22,150       | 12,690       | 115,669      | 47,437       |
| Segments after Class3D                        | n/a          | 27,103       | n/a          | n/a          | 54,900       | 29,594       |
| Resolution (Å)                                | 3.2          | 3.3          | 4.7          | 8.4          | 3.8          | 4.2          |
| B-factor (Å <sup>2</sup> )                    | -90          | -61          | -152         | n/a          | -87          | -58          |
| Helical rise (Å)                              | 2.37         | 4.76         | 2.36         | 4.74         | 2.39         | 4.84         |
| Helical twist (°)                             | 179.45       | -1.04        | 179.40       | -1.05        | 179.45       | -1.02        |

\* For image processing, the segments for case 16 were downscaled to a pixel size of 1.53 Å.
