# Supplementary material for: Tau filaments from multiple cases of sporadic and inherited Alzheimer’s disease adopt a common fold
Source: Springer Nature journal article supplement (doi:10.1007/s00401-018-1914-z), 2018-10-01
Supplement: 401_2018_1914_MOESM3_ESM.pdf [file 401_2018_1914_MOESM3_ESM.pdf]

### Online Resource 3: Patient 2 PHF and SF model statistics

| <b>Refinement</b>                                | <b>PHFs</b> | <b>SFs</b> |
|--------------------------------------------------|-------------|------------|
| Initial model used (PDB code)                    | 5o3l        | 5o3t       |
| Model resolution (Å)                             | 3.2         | 3.3        |
| FSC threshold                                    | 0.5         | 0.5        |
| Map sharpening <i>B</i> factor (Å <sup>2</sup> ) | -90         | -61        |
| Model composition                                |             |            |
| Non-hydrogen atoms                               | 587         | 587        |
| Protein residues                                 | 456         | 456        |
| Average <i>B</i> factor (Å <sup>2</sup> )        | 72.8        | 82.0       |
| R.m.s. deviations                                |             |            |
| Bond lengths (Å)                                 | 0.019       | 0.016      |
| Bond angles (°)                                  | 1.37        | 1.11       |
| Validation                                       |             |            |
| MolProbity score                                 | 1.90        | 2.00       |
| Clashscore                                       | 5.59        | 6.71       |
| Poor rotamers (%)                                | 0           | 0          |
| Ramachandran plot                                |             |            |
| Favored (%)                                      | 88          | 87         |
| Allowed (%)                                      | 100         | 100        |
| Disallowed (%)                                   | 0           | 0          |
