# Supplementary material for: Tau filaments from multiple cases of sporadic and inherited Alzheimer’s disease adopt a common fold
Source: PubMed Central journal article supplement (PMC6208733; doi:10.1007/s00401-018-1914-z), 2018-10-01
Supplement: 401_2018_1914_MOESM6_ESM.pdf [file 401_2018_1914_MOESM6_ESM.pdf]

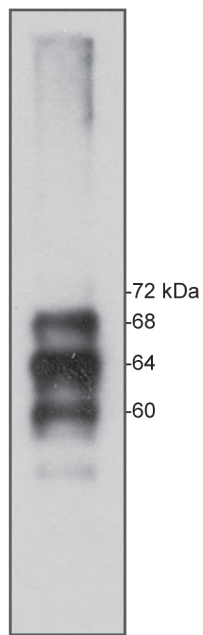

**BR136**

**Online Resource 6** Western blot with BR136. Western blot with antibody BR136 (against residues 244–257 from R1 of tau) of the sarkosyl-insoluble fraction from the frontal cortex of AD case 1.
