# Supplementary material for: Tau filaments from multiple cases of sporadic and inherited Alzheimer’s disease adopt a common fold
Source: PubMed Central journal article supplement (PMC6208733; doi:10.1007/s00401-018-1914-z), 2018-10-01
Supplement: 401_2018_1914_MOESM7_ESM.pdf [file 401_2018_1914_MOESM7_ESM.pdf]

## Online Resource 7: Immuno-EM labelling of PHFs and SFs

| Case | Brain region     | R1  |    | R2  |    | R3 |    | R4 |    |
|------|------------------|-----|----|-----|----|----|----|----|----|
|      |                  | -   | +  | -   | +  | -  | +  | -  | +  |
| 1    | Frontal cortex   | Yes | No | Yes | No | No | No | No | No |
| 2    | Frontal cortex   | Yes | No | Yes | No | No | No | No | No |
| 3    | Frontal cortex   | Yes | No | Yes | No | No | No | No | No |
| 4    | Frontal cortex   | Yes | No | Yes | No | No | No | No | No |
| 5    | Frontal cortex   | Yes | No | Yes | No | No | No | No | No |
| 6    | Frontal cortex   | Yes | No | Yes | No | No | No | No | No |
| 7    | Frontal cortex   | Yes | No | Yes | No | No | No | No | No |
| 8    | Frontal cortex   | Yes | No | Yes | No | No | No | No | No |
| 9    | Frontal cortex   | Yes | No | Yes | No | No | No | No | No |
| 10   | Frontal cortex   | Yes | No | Yes | No | No | No | No | No |
| 11   | Frontal cortex   | Yes | No | Yes | No | No | No | No | No |
| 12   | Frontal cortex   | Yes | No | Yes | No | No | No | No | No |
| 13   | Frontal cortex   | Yes | No | Yes | No | No | No | No | No |
| 14   | Frontal cortex   | Yes | No | Yes | No | No | No | No | No |
| 15   | Frontal cortex   | Yes | No | Yes | No | No | No | No | No |
| 1    | Temporal cortex  | Yes | No | Yes | No | No | No | No | No |
| 1    | Occipital cortex | Yes | No | Yes | No | No | No | No | No |
| 1    | Parietal cortex  | Yes | No | Yes | No | No | No | No | No |
| 1    | Cingulate cortex | Yes | No | Yes | No | No | No | No | No |
| 1    | Thalamus         | Yes | No | Yes | No | No | No | No | No |
| 1    | S. innominata    | Yes | No | Yes | No | No | No | No | No |
| 1    | Putamen          | Yes | No | Yes | No | No | No | No | No |
| 16   | Frontal cortex   | Yes | No | Yes | No | No | No | No | No |
| 17   | Frontal cortex   | Yes | No | Yes | No | No | No | No | No |
| 18   | Frontal cortex   | Yes | No | Yes | No | No | No | No | No |
| 18   | Occipital cortex | Yes | No | Yes | No | No | No | No | No |
| 19   | Frontal cortex   | Yes | No | Yes | No | No | No | No | No |
| 19   | Occipital cortex | Yes | No | Yes | No | No | No | No | No |

-, no pronase; +, pronase. Yes, antibody labelling; No, no antibody labelling. Cases 1, 2, 3 and 16 were used for cryo-EM (highlighted in yellow).
